# Supplementary material
Source: publisher figshare collection journal article supplement (https://frontiersin.figshare.com/ndownloader/files/21663849)
Supplement: Supplementary file [file 21663849]

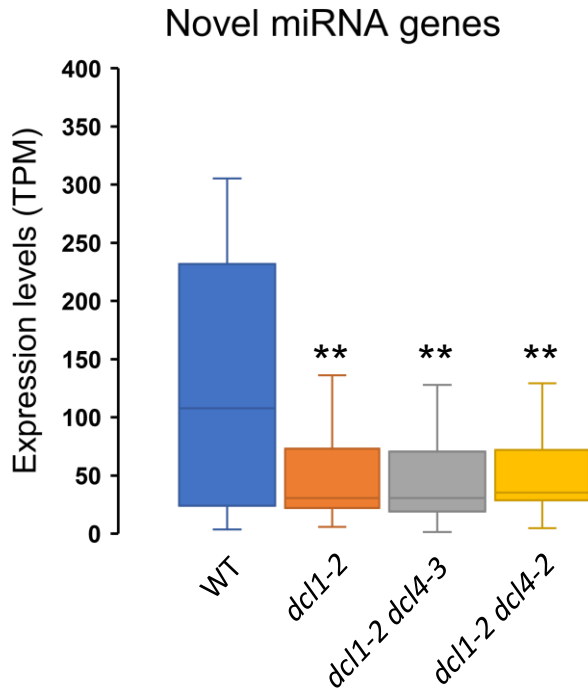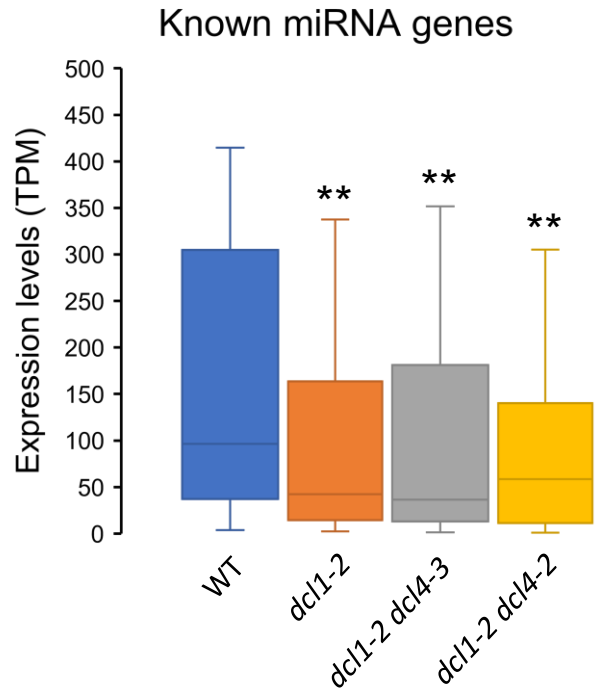

**Supplementary Figure 1.** Expression levels of miRNA genes were significantly reduced in *dcl1* mutants. Statistical analysis was conducted using the Student's *t*-test. \*\*, *P*-value < 0.001.
